# Supplementary material for: Resistance profile of the HIV-1 maturation inhibitor GSK3532795 in vitro and in a clinical study
Source: PubMed Central journal article supplement (PMC6797179; doi:10.1371/journal.pone.0224076), 2019-10-17
Supplement: pone.0224076.s001.pdf [file pone.0224076.s001.pdf]

S1 Table: Amino Acid Substitutions Selected in Gag During Independent Sequential Passage Experiments in the Presence of Increasing Concentrations of GSK35323795

|                          |                                    |                    |                            | Gag region <sup>a,b</sup> |             |         |               |            |         |
|--------------------------|------------------------------------|--------------------|----------------------------|---------------------------|-------------|---------|---------------|------------|---------|
|                          |                                    |                    |                            | Capsid                    |             |         |               | Capsid/SP1 |         |
| Start Virus <sup>a</sup> | Start [drug],<br>xEC <sub>50</sub> | Expt/<br>culture # | P#<br>(Days <sup>c</sup> ) | 218                       | 219         | 326     | 332           | 362        | 364     |
| V362I/ V370A             | 1                                  | 3/1,2,3            | P11                        |                           | H219Q (2/3) |         |               |            |         |
| V362I                    | 1                                  | 3/1,2,3            | P11                        |                           | H219Q       |         | T332T/N (1/3) |            |         |
| T332S/ V362I             | 1                                  | 3/1,2,3            | P11                        |                           | H219Q (2/3) |         |               |            |         |
| T332S                    | 1                                  | 3/1                | P11                        |                           | H219Q       |         |               | V362V/I    |         |
|                          |                                    | 3/2                |                            |                           | H219Q       |         |               |            | A364V   |
|                          |                                    | 3/3                |                            |                           | H219P       |         |               |            | A364V   |
| R286K/ V370A             | 1                                  | 3/1                | P11                        |                           | H219Q       |         |               | V362I      |         |
|                          |                                    | 3/2                |                            | V218V/A                   |             | A326T   |               | V362I      |         |
|                          |                                    | 3/3                |                            |                           |             | A326T   |               | V362I      |         |
| R286K                    | 1                                  | 3/2                | P11                        |                           | H219Q       |         |               | V362V/I    | A364A/V |
|                          |                                    | 3/1,3              |                            |                           | H219Q       |         |               |            | A364V   |
| ΔV370                    | 1                                  | 3/1,2,3            | P11                        |                           | H219Q       | A326A/T |               |            |         |
| ΔT371                    | 1                                  | 3/1,2,3            | P11                        |                           | H219Q       |         |               |            | A364A/V |

<sup>a</sup>WT virus was NL<sub>4-3</sub>RepRluc Gag P373S, variant viruses were NL<sub>4-3</sub>RepRluc Gag P373S with the indicated additional changes in Gag. Infections were initiated at a multiplicity of infection of 0.005; <sup>b</sup> sequence changes were observed in Matrix, SP2/P6 or protease genes; <sup>c</sup>Number of days in culture. EC<sub>50</sub>, 50% effective concentration; P#, passage number; SP1, spacer peptide 1; WT, wild-type
