# Supplementary material for: Resistance profile of the HIV-1 maturation inhibitor GSK3532795 in vitro and in a clinical study
Source: PubMed Central journal article supplement (PMC6797179; doi:10.1371/journal.pone.0224076), 2019-10-17
Supplement: pone.0224076.s002.pdf [file pone.0224076.s002.pdf]

S2 Table: Sequences of key amino acids in Gag in subjects treated with 5-120 mg GSK3532795<sup>a</sup>

| Dose | #  | Log10 HIV-1 RNA Maximum Decline | IC50 FOLD CHANGE | DAY | V362    | A364    | Q369    | V370    | T371  |
|------|----|---------------------------------|------------------|-----|---------|---------|---------|---------|-------|
| 5    | 6  | -0.22                           | 387.44           | -1  | V362I   | A364    | Q369    | V370    | T371  |
| 5    | 14 | -0.48                           | 1.62             | -1  | V362    | A364    | Q369    | V370    | T371  |
| 5    | 21 | -0.23                           | 2.98             | -1  | V362I   | A364    | Q369    | V370    | T371  |
| 5    | 23 | -0.32                           | 0.68             | -1  | V362    | A364    | Q369    | V370    | T371  |
| 5    | 36 | -0.64                           | 2.68             | -1  | V362I/V | A364    | Q369H/Q | V370A/V | T371N |
| 5    | 47 | -0.7                            | 0.9              | -1  | V362    | A364    | Q369    | V370    | T371  |
| 5    | 58 | -0.78                           | 1.03             | -1  | V362I/V | A364    | Q369    | V370    | T371  |
| 5    | 59 | -0.52                           | 20.06            | -1  | V362I/V | A364    | Q369    | V370A   | T371Q |
| 10   | 17 | -1.31                           | 2.52             | -1  | V362    | A364    | Q369    | V370M   | T371  |
| 10   | 17 | -1.31                           | 1.57             | 10  | V362I/V | A364    | Q369    | V370M   | T371  |
| 10   | 17 | -1.31                           | 10.01            | 14  | V362    | A364    | Q369    | V370M   | T371  |
| 10   | 19 | -0.64                           | 1.28             | -1  | V362    | A364    | Q369    | V370    | T371- |
| 10   | 19 | -0.64                           | 1.07             | 10  | V362    | A364    | Q369    | V370    | T371- |
| 10   | 19 | -0.64                           | 1.27             | 14  | V362    | A364    | Q369    | V370    | T371- |
| 10   | 20 | -0.91                           | 17.52            | -1  | V362    | A364    | Q369    | V370M   | T371  |
| 10   | 20 | -0.91                           | NR <sup>b</sup>  | 10  |         |         |         |         |       |
| 10   | 20 | -0.91                           | NR               | 14  |         |         |         |         |       |
| 10   | 25 | -0.97                           | 41.05            | -1  | V362I/V | A364    | Q369    | V370    | T371  |
| 10   | 25 | -0.97                           | 423.23           | 10  | V362I   | A364    | Q369    | V370    | T371  |
| 10   | 25 | -0.97                           | >617             | 14  | V362I   | A364    | Q369    | V370    | T371  |
| 10   | 34 | -1.76                           | 0.63             | -1  | V362    | A364    | Q369    | V370    | T371  |
| 10   | 34 | -1.76                           | 42.24            | 10  | V362    | A364A/V | Q369    | V370    | T371  |
| 10   | 34 | -1.76                           | >667             | 14  | V362I/V | A364A/V | Q369    | V370    | T371  |
| 10   | 43 | -0.74                           | >633             | -1  | V362I   | A364    | Q369    | V370    | T371N |
| 10   | 43 | -0.74                           | >667             | 10  | V362I   | A364    | Q369    | V370    | ΔT371 |

|    |    |       |        |    |         |         |      |         |       |
|----|----|-------|--------|----|---------|---------|------|---------|-------|
| 10 | 43 | -0.74 | >667   | 14 | V362I   | A364    | Q369 | V370    | T371N |
| 10 | 48 | -1.05 | 0.99   | -1 | V362    | A364    | Q369 | V370    | T371  |
| 10 | 48 | -1.05 | NR     | 10 |         |         |      |         |       |
| 10 | 48 | -1.05 | 2.19   | 14 | V362    | A364    | Q369 | V370    | T371  |
| 10 | 55 | -0.98 | >633   | -1 | V362I   | A364    | Q369 | V370A   | T371  |
| 10 | 55 | -0.98 | 453.52 | 10 | V362I   | A364    | Q369 | V370A   | T371  |
| 10 | 55 | -0.98 | >667   | 14 | V362I   | A364    | Q369 | V370A   | T371  |
| 20 | 2  | -1    | 398.75 | -1 | V362    | A364    | Q369 | V370    | T371  |
| 20 | 2  | -1    | 648.95 | 10 | V362    | A364    | Q369 | V370    | T371  |
| 20 | 2  | -1    | >667   | 14 | V362    | A364    | Q369 | V370L/V | T371  |
| 20 | 13 | -1.68 | 0.48   | -1 | V362    | A364    | Q369 | V370    | T371  |
| 20 | 13 | -1.68 | 0.52   | 10 | V362    | A364    | Q369 | V370I/V | T371  |
| 20 | 13 | -1.68 | 1.01   | 14 | V362    | A364A/V | Q369 | V370    | T371  |
| 20 | 18 | -0.89 | NR     | -1 |         |         |      |         |       |
| 20 | 18 | -0.89 | NR     | 10 |         |         |      |         |       |
| 20 | 18 | -0.89 | NR     | 14 |         |         |      |         |       |
| 20 | 26 | -1.23 | 1.66   | -1 | V362    | A364    | Q369 | V370A   | T371N |
| 20 | 26 | -1.23 | >667   | 10 | V362I/V | A364A/V | Q369 | V370A   | T371N |
| 20 | 26 | -1.23 | >667   | 14 | V362I/V | A364A/V | Q369 | V370A   | T371N |
| 20 | 31 | -0.13 | >633   | -1 | V362    | A364    | Q369 | V370A/V | T371  |
| 20 | 31 | -0.13 | 63.86  | 10 | V362    | A364    | Q369 | V370A   | T371  |
| 20 | 31 | -0.13 | NR     | 14 |         |         |      |         |       |
| 20 | 42 | -0.63 | >633   | -1 | V362I   | A364    | Q369 | V370I   | T371  |
| 20 | 42 | -0.63 | >602   | 10 | V362I   | A364    | Q369 | V370I   | T371  |
| 20 | 42 | -0.63 | >667   | 14 | V362I   | A364    | Q369 | V370I   | T371  |
| 20 | 52 | -2.12 | 0.48   | -1 | V362    | A364    | Q369 | V370M   | T371  |
| 20 | 52 | -2.12 | 106    | 10 | V362    | A364A/V | Q369 | V370M   | T371  |
| 20 | 52 | -2.12 | 227.4  | 14 | V362    | A364A/V | Q369 | V370M   | T371  |
| 20 | 57 | -1.66 | 0.48   | -1 | V362    | A364    | Q369 | V370    | T371  |
| 20 | 57 | -1.66 | 0.51   | 10 | V362    | A364    | Q369 | V370    | T371  |

|    |    |       |        |    |         |         |         |         |       |
|----|----|-------|--------|----|---------|---------|---------|---------|-------|
| 20 | 57 | -1.66 | 0.41   | 14 | V362    | A364    | Q369    | V370    | T371  |
| 40 | 1  | -1.09 | 0.39   | -1 | V362    | A364    | Q369    | V370    | T371  |
| 40 | 1  | -1.09 | 3.79   | 10 | V362I/V | A364A/V | Q369    | V370    | T371  |
| 40 | 1  | -1.09 | >667   | 14 | V362    | A364A/V | Q369    | V370    | T371  |
| 40 | 10 | -1.77 | 103.85 | -1 | V362    | A364    | Q369    | V370M   | T371  |
| 40 | 10 | -1.77 | 267.89 | 10 | V362    | A364    | Q369    | V370M   | T371  |
| 40 | 10 | -1.77 | >667   | 14 | V362I/V | A364A/V | Q369    | V370M   | T371X |
| 40 | 11 | -1.54 | NR     | -1 |         |         |         |         |       |
| 40 | 11 | -1.54 | NR     | 10 |         |         |         |         |       |
| 40 | 11 | -1.54 | NR     | 14 |         |         |         |         |       |
| 40 | 22 | -0.93 | 1.63   | -1 | V362    | A364    | Q369    | V370M   | T371  |
| 40 | 22 | -0.93 | 20.28  | 10 | V362    | A364    | Q369H/Q | V370M   | T371  |
| 40 | 22 | -0.93 | 23.47  | 14 | V362I/V | A364    | Q369H/Q | V370M   | T371  |
| 40 | 32 | -1.88 | 0.4    | -1 | V362    | A364    | Q369    | V370    | T371  |
| 40 | 32 | -1.88 | 0.41   | 10 | V362    | A364    | Q369    | V370    | T371  |
| 40 | 32 | -1.88 | NR     | 14 |         |         |         |         |       |
| 40 | 38 | -1.71 | 68.53  | -1 | V362    | A364    | Q369    | V370A/V | T371  |
| 40 | 38 | -1.71 | 495.75 | 10 | V362    | A364    | Q369    | V370A   | T371  |
| 40 | 38 | -1.71 | >667   | 14 | V362I/V | A364    | Q369    | V370A   | T371  |
| 40 | 40 | -1.82 | 0.68   | -1 | V362    | A364    | Q369    | V370    | T371  |
| 40 | 40 | -1.82 | 1.79   | 10 | V362    | A364    | Q369    | V370    | T371  |
| 40 | 40 | -1.82 | 0.59   | 14 | V362    | A364    | Q369    | V370    | T371  |
| 40 | 44 | -1.69 | 1.14   | -1 | V362    | A364    | Q369    | V370    | T371  |
| 40 | 44 | -1.69 | 132.05 | 10 | V362    | A364    | Q369    | V370M   | T371  |
| 40 | 44 | -1.69 | 0.48   | 14 | V362    | A364    | Q369    | V370    | T371  |
| 80 | 82 | -1.32 | 1.63   | -1 | V362    | A364    | Q369    | V370    | T371Q |
| 80 | 82 | -1.32 | 2.06   | 10 | V362    | A364    | Q369    | V370    | T371Q |
| 80 | 82 | -1.32 | 0.74   | 14 | V362    | A364    | Q369    | V370    | T371Q |
| 80 | 85 | -1.5  | 3.13   | -1 | V362    | A364    | Q369    | V370    | T371  |
| 80 | 85 | -1.5  | 145.94 | 10 | V362I/V | A364A/V | Q369    | V370    | T371  |

|     |     |       |        |    |         |         |      |         |       |
|-----|-----|-------|--------|----|---------|---------|------|---------|-------|
| 80  | 85  | -1.5  | >581   | 14 | V362I/V | A364A/V | Q369 | V370    | T371  |
| 80  | 86  | -1.04 | 2.03   | -1 | V362    | A364    | Q369 | V370M   | T371  |
| 80  | 86  | -1.04 | 2.26   | 10 | V362    | A364    | Q369 | V370M   | T371  |
| 80  | 86  | -1.04 | >581   | 14 | V362I/V | A364    | Q369 | V370M   | T371  |
| 80  | 88  | -1.6  | 0.41   | -1 | V362    | A364    | Q369 | V370    | T371  |
| 80  | 88  | -1.6  | 0.51   | 10 | V362    | A364    | Q369 | V370    | T371  |
| 80  | 88  | -1.6  | 1.38   | 14 | V362    | A364A/V | Q369 | V370    | T371  |
| 80  | 90  | -1.82 | 0.38   | -1 | V362    | A364    | Q369 | V370I/V | T371  |
| 80  | 90  | -1.82 | 0.52   | 10 | V362    | A364    | Q369 | V370I/V | T371  |
| 80  | 90  | -1.82 | 96.42  | 14 | V362I/V | A364A/V | Q369 | V370I/V | T371  |
| 80  | 98  | -1.73 | 0.95   | -1 | V362    | A364    | Q369 | V370    | T371  |
| 80  | 98  | -1.73 | 0.94   | 10 | V362    | A364A/V | Q369 | V370    | T371  |
| 80  | 98  | -1.73 | >581   | 14 | V362    | A364A/V | Q369 | V370    | T371  |
| 80  | 99  | -1.72 | 0.86   | -1 | V362    | A364    | Q369 | V370    | T371  |
| 80  | 99  | -1.72 | 2.4    | 10 | V362    | A364    | Q369 | V370    | T371  |
| 80  | 99  | -1.72 | NR     | 14 |         |         |      |         |       |
| 80  | 102 | -1.4  | 0.59   | -1 | V362    | A364    | Q369 | V370    | T371  |
| 80  | 102 | -1.4  | 0.7    | 10 | V362    | A364    | Q369 | V370    | T371  |
| 80  | 102 | -1.4  | 0.85   | 14 | V362    | A364A/V | Q369 | V370    | T371  |
| 120 | 6   | -2.02 | 4.42   | -1 | V362    | A364    | Q369 | V370-   | T371  |
| 120 | 6   | -2.02 | 4.39   | 10 | V362    | A364    | Q369 | V370-   | T371  |
| 120 | 6   | -2.02 | 17.99  | 14 | V362    | A364    | Q369 | V370-   | T371  |
| 120 | 106 | -1.98 | 36.89  | -1 | V362    | A364    | Q369 | V370M   | T371  |
| 120 | 106 | -1.98 | 4.01   | 10 | V362    | A364    | Q369 | V370M   | T371  |
| 120 | 106 | -1.98 | 337.2  | 14 | V362    | A364A/V | Q369 | V370M   | T371  |
| 120 | 109 | -0.83 | 2.95   | -1 | V362I/V | A364    | Q369 | V370    | T371  |
| 120 | 109 | -0.83 | 407.06 | 10 | V362I   | A364    | Q369 | V370    | T371  |
| 120 | 109 | -0.83 | 214.11 | 14 | V362I   | A364A/V | Q369 | V370    | T371  |
| 120 | 110 | -2.07 | 0.82   | -1 | V362    | A364    | Q369 | V370A/V | T371  |
| 120 | 110 | -2.07 | 5.2    | 10 | V362    | A364    | Q369 | V370X   | T371X |

|                  |     |       |        |    |      |         |      |         |       |
|------------------|-----|-------|--------|----|------|---------|------|---------|-------|
| 120              | 110 | -2.07 | 0.89   | 14 | V362 | A364    | Q369 | V370    | T371  |
| 120              | 111 | -1.57 | 3.85   | -1 | V362 | A364    | Q369 | V370    | T371  |
| 120              | 111 | -1.57 | 15.83  | 10 | V362 | A364    | Q369 | V370A/V | T371  |
| 120              | 111 | -1.57 | >704   | 14 | V362 | A364    | Q369 | V370A/V | T371  |
| 120              | 112 | -1.74 | 1.58   | -1 | V362 | A364    | Q369 | V370    | T371  |
| 120              | 112 | -1.74 | 2.17   | 10 | V362 | A364    | Q369 | V370    | T371  |
| 120              | 112 | -1.74 | 27.01  | 14 | V362 | A364A/V | Q369 | V370    | T371  |
| 120              | 115 | -1.81 | 0.7    | -1 | V362 | A364    | Q369 | V370    | T371  |
| 120              | 115 | -1.81 | 1.56   | 10 | V362 | A364    | Q369 | V370    | T371  |
| 120              | 115 | -1.81 | >704   | 14 | V362 | A364A/V | Q369 | V370    | T371  |
| 120              | 116 | -1.42 | -1.42  | -1 | V362 | A364    | Q369 | V370    | T371  |
| 120              | 116 | -1.42 | 0.42   | 10 | V362 | A364    | Q369 | V370    | T371  |
| 120              | 116 | -1.42 | 0.56   | 14 | V362 | A364A/V | Q369 | V370    | T371  |
| PBO <sup>b</sup> | 83  | 0.08  | 2.15   | -1 | V362 | A364    | Q369 | V370    | T371  |
| PBO              | 83  | 0.08  | 1.35   | 10 | V362 | A364    | Q369 | V370    | T371  |
| PBO              | 83  | 0.08  | 1.64   | 14 | V362 | A364    | Q369 | V370    | T371  |
| PBO              | 91  | -0.33 | 8.44   | -1 | V362 | A364    | Q369 | V370L   | T371  |
| PBO              | 91  | -0.33 | 20.72  | 10 | V362 | A364    | Q369 | V370L   | T371  |
| PBO              | 91  | -0.33 | 14.41  | 14 | V362 | A364    | Q369 | V370L   | T371  |
| PBO              | 105 | -0.6  | 183.72 | -1 | V362 | A364    | Q369 | V370L   | ΔT371 |
| PBO              | 105 | -0.6  | 133.86 | 10 | V362 | A364    | Q369 | V370L   | ΔT371 |
| PBO              | 105 | -0.6  | 103.46 | 14 | V362 | A364    | Q369 | V370L   | ΔT371 |
| PBO              | 126 | -1.05 | 1.08   | -1 | V362 | A364    | Q369 | V370X   | T371X |
| PBO              | 126 | -1.05 | 1.65   | 10 | V362 | A364    | Q369 | V370X   | T371X |
| PBO              | 126 | -1.05 | 1.55   | 14 | V362 | A364    | Q369 | V370X   | T371X |

<sup>a</sup>: Subjects treated on Day 1 with the indicated dose of GSK3532795 for 10 days. Sequences of Gag were obtained at Days '1, 10 and 14; Samples at Day 10 and 14 for the 5 mg cohort were not analyzed due to lack of an antiviral effect; Amino acids found at positions 363, 364, 369-371 are shown; green cells indicate same sequence as consensus; purple cell indicates a non-consensus sequence or mixture; <sup>b</sup>: NR = Nonreportable; PBO = placebo dosed.
